# Supplementary material for: Mercado discográfico y crisis económica
Source: PLOS journal article supplement (doi:10.1371/journal.pone.0220698), 1993-01-01
Supplement: S5 (10.1371/journal.pone.0220698.s005) [file journal.pone.0220698.s005]

**S5 Table. Retention time (average  $\pm$  SD) and exact mass accuracy ( $\Delta$ ppm) of the targeted analytes, evaluated on continued calibration verification (CCV) standards.**

Quality control spikes were run after every 15 injections in the LC-MS sequence. The relative standard deviation (RSD) of retention time was  $<0.2\%$ , which is within the tolerance threshold of  $\pm 2.5\%$  set by the European Commission (2002/657/EC). The  $\Delta$ ppm tolerance applied was  $\pm 5$  ppm.

|      | Retention time (min) | Average measured m/z    | Theoretical m/z | $\Delta$ ppm |
|------|----------------------|-------------------------|-----------------|--------------|
| AEG  | $6.29 \pm 0.007$     | $561.20417 \pm 0.00007$ | 561.20201       | 3.9          |
| BAMA | $6.45 \pm 0.005$     | $561.20419 \pm 0.00009$ | 561.20201       | 3.9          |
| DAB  | $6.54 \pm 0.007$     | $561.20427 \pm 0.00006$ | 561.20201       | 4.0          |
| BMAA | $6.65 \pm 0.012$     | $561.20437 \pm 0.00009$ | 561.20201       | 4.2          |
