# Supplementary material for: Mercado discográfico y crisis económica
Source: PLOS journal article supplement (doi:10.1371/journal.pone.0220698), 1993-01-01

**S6 Fig. Optimization of derivatization reaction: influence of borate buffer concentration on the FMOC-BMAA signal.** A surface water matrix was spiked at 1000 ng L<sup>-1</sup> with BMAA and submitted to the different conditions. Absolute areas were normalized (%) to the maximum observed among the tested conditions. Error bars represent standard deviations (n = 3).

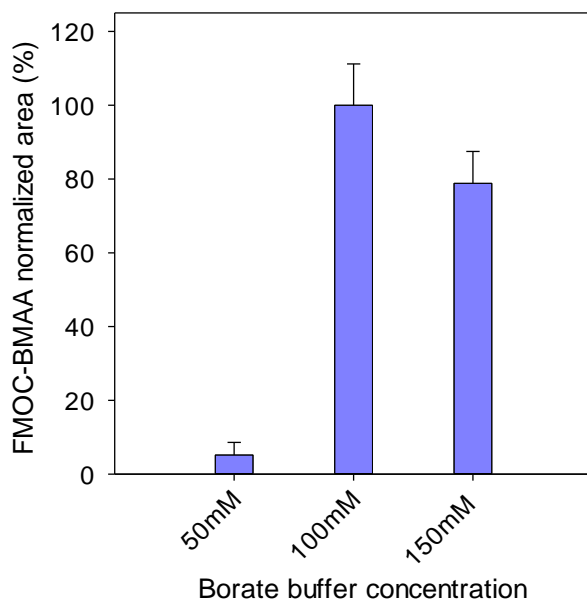

Supplement: S11 (10.1371/journal.pone.0220698.s011) [file journal.pone.0220698.s011]
